# Supplementary material
Source: MDPI journal article supplement (https://www.mdpi.com/2071-1050/13/24/13996)
Supplement: s1 [file s1]

**Table S1:** Date of sampling and coordinates of each sampling stand from different locations of *Avicennia marina* populations along the Red Sea coast of Saudi Arabia.

| Location | Site       | Stand | Stand coordinates                           | Date       |
|----------|------------|-------|---------------------------------------------|------------|
| Northern | Duba       | 1     | Lat. 27° 26' 01.5" N, Long. 35° 36' 02.1" E | 2/1/2018   |
|          |            | 2     | Lat. 27° 10' 25.4" N, Long. 35° 47' 29.1" E |            |
|          |            | 3     | Lat. 27° 09' 58.8" N, Long. 35° 47' 19.0" E |            |
| Central  | Jeddah     | 1     | Lat. 21° 15' 52.4" N, Long. 39° 07' 43.8" E | 31/1/2017  |
|          |            | 2     | Lat. 21° 16' 01.5" N, Long. 39° 07' 37.7" E |            |
|          |            | 3     | Lat. 21° 16' 08.8" N, Long. 39° 07' 33.1" E |            |
| Southern | Amaq       | 1     | Lat. 18° 25' 20.3" N, Long. 41° 27' 11.2" E | 27/12/2016 |
|          |            | 2     | Lat. 18° 25' 26.5" N, Long. 41° 27' 07.9" E |            |
|          |            | 3     | Lat. 18° 25' 35.9" N, Long. 41° 27' 06.1" E |            |
|          | Al-Birk    | 1     | Lat. 18° 15' 56.6" N, Long. 41° 30' 43.6" E | 14/11/2016 |
|          |            | 2     | Lat. 18° 13' 42.1" N, Long. 41° 31' 40.9" E |            |
|          |            | 3     | Lat. 18° 11' 55.5" N, Long. 41° 32' 25.4" E |            |
|          | Al-Shuqaiq | 1     | Lat. 17° 48' 03.3" N, Long. 41° 53' 13.2" E | 14/11/2016 |
|          |            | 2     | Lat. 17° 47' 56.4" N, Long. 41° 53' 02.2" E |            |
|          |            | 3     | Lat. 17° 47' 33.1" N, Long. 41° 53' 19.5" E |            |
|          | Sabya      | 1     | Lat. 17° 08' 00.7" N, Long. 42° 24' 55.6" E | 27/10/2016 |
|          |            | 2     | Lat. 17° 08' 20.0" N, Long. 42° 25' 05.5" E |            |
|          |            | 3     | Lat. 17° 08' 34.8" N, Long. 42° 25' 11.4" E |            |
|          | Jazan      | 1     | Lat. 17° 32' 40.7" N, Long. 42° 11' 24.0" E | 4/5/2017   |
|          |            | 2     | Lat. 17° 32' 28.4" N, Long. 42° 11' 39.2" E |            |
|          |            | 3     | Lat. 16° 50' 21.4" N, Long. 42° 34' 39.9" E |            |

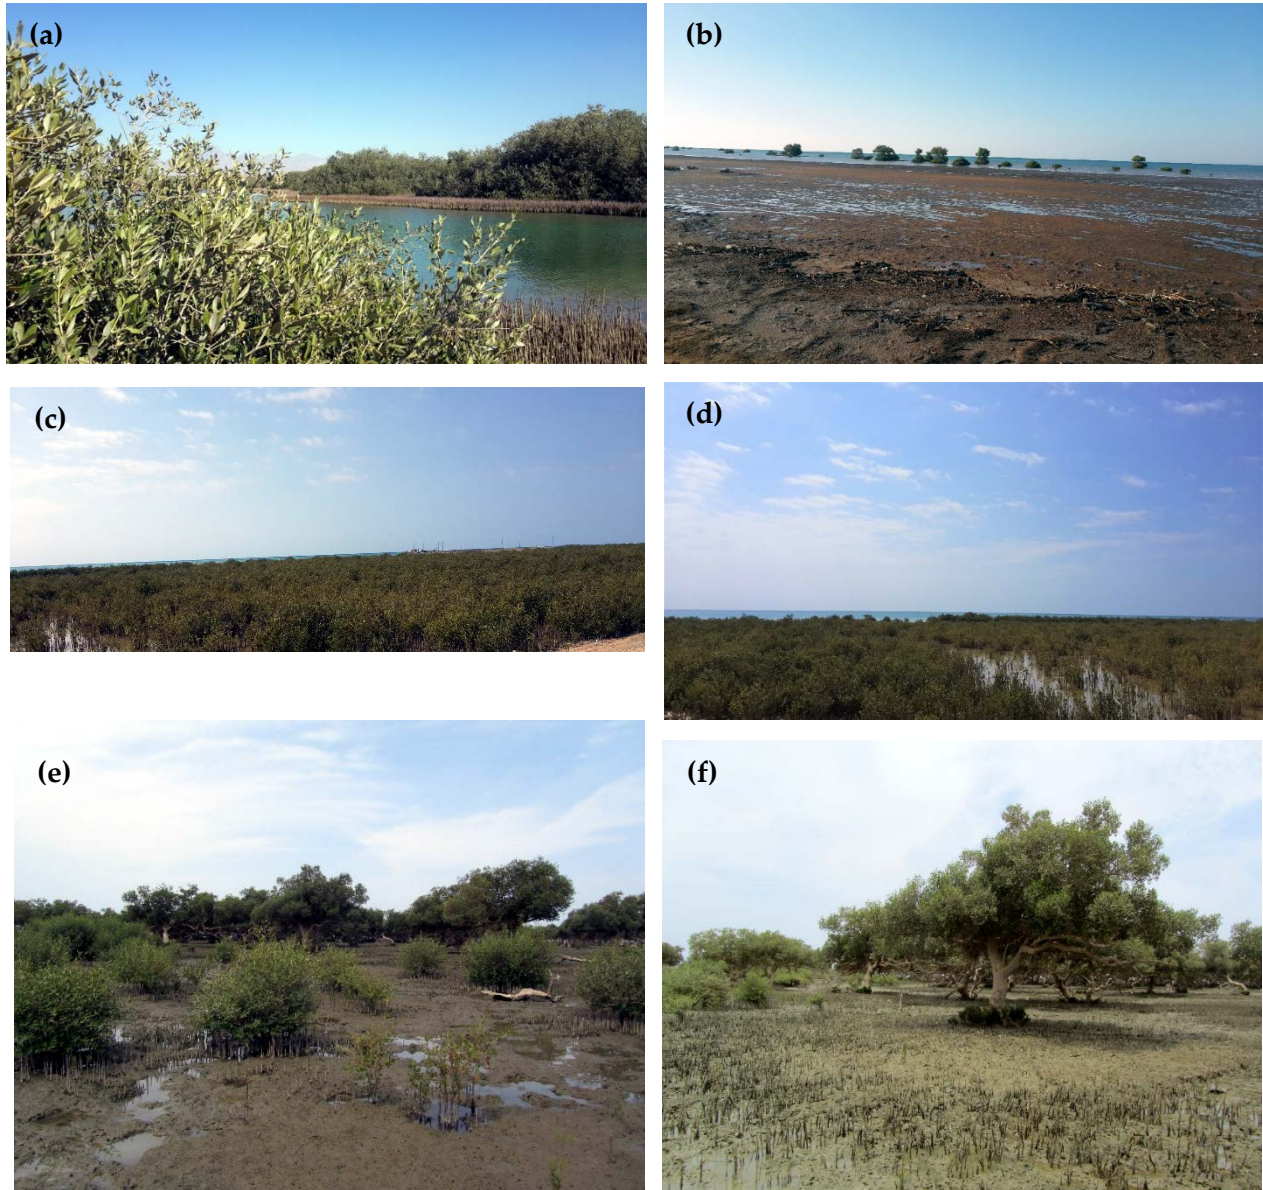

**Figure S1:** *Avicennia marina* mangrove in the different studied locations. a and b- from the northern location (Dubai City); c and d- from the central location (Jeddah City); and e and f- from the southern location in the Saudi Arabian Red Sea coast.

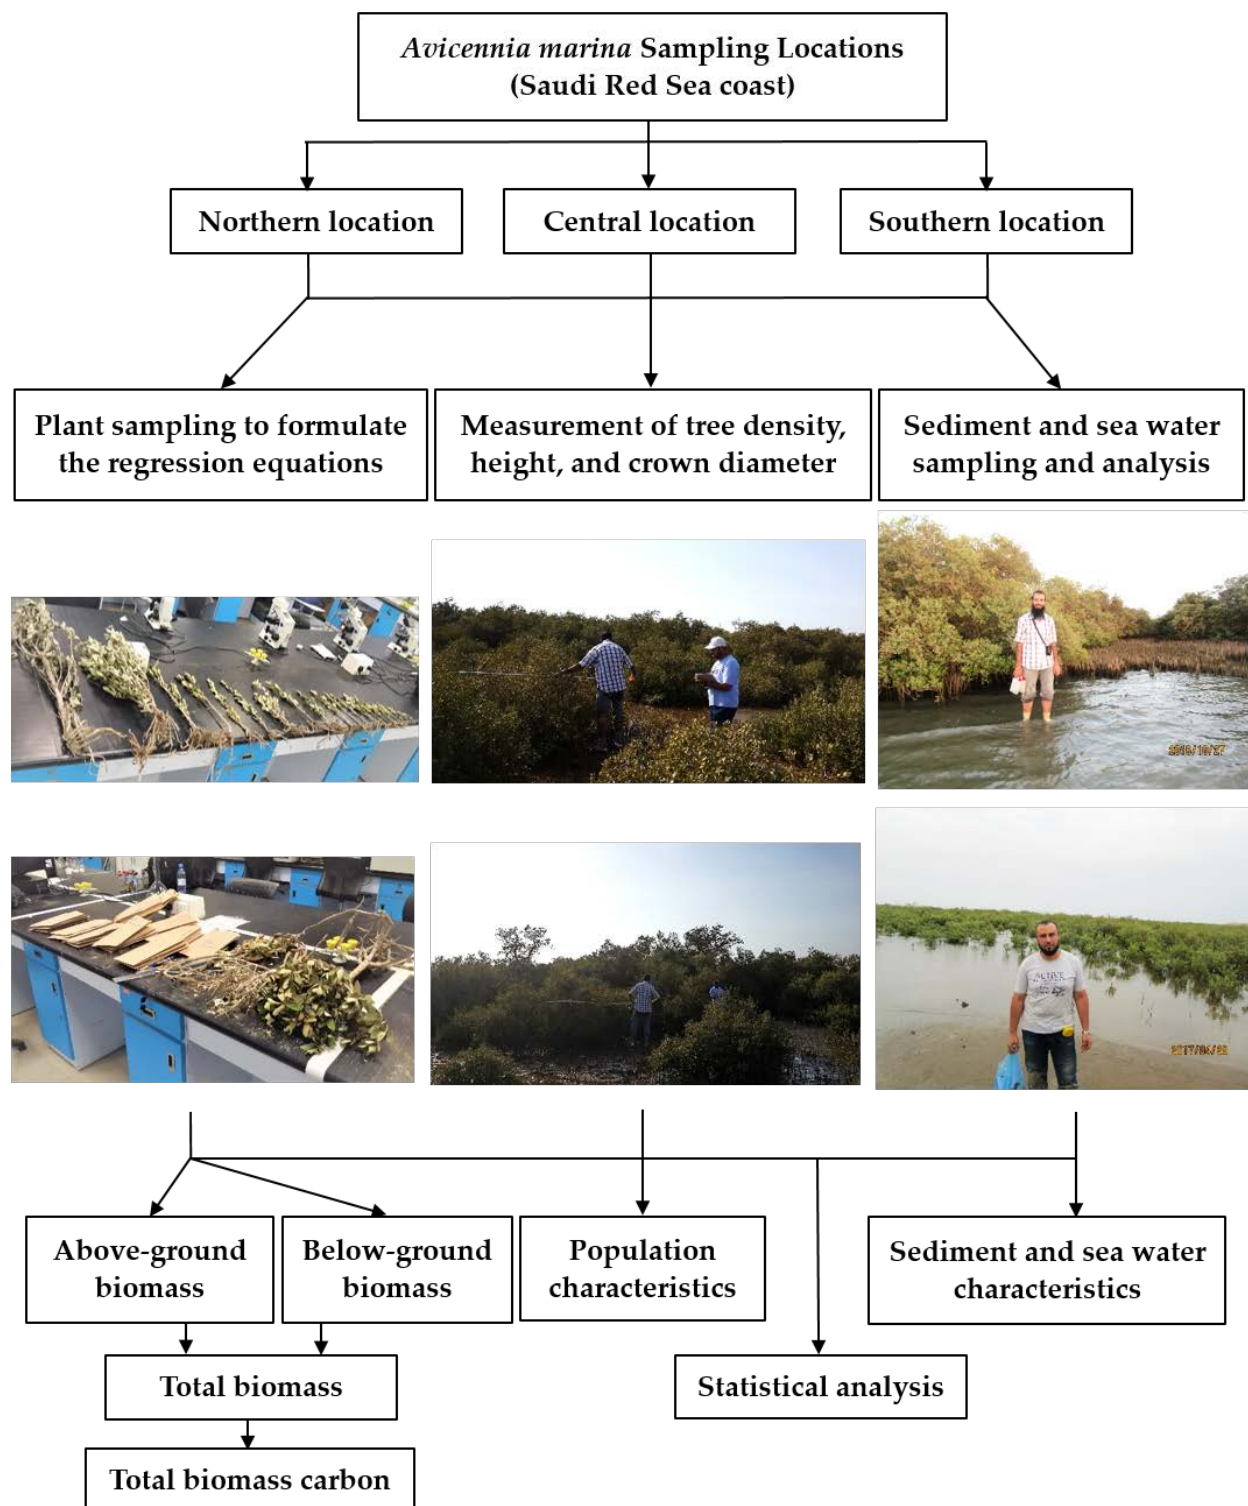

**Figure S2:** Flowchart represents research design and sample analysis.
